# Supplementary material for: Prudently designed Se@fMWCNT as a peroxidase mimicking nanozyme for distinctive electrochemical detection of H2O2 and glutathione
Source: Royal Society of Chemistry journal article supplement (doi:10.1039/d4tc01231c), 2024-01-01
Supplement: d4tc01231c1.pdf [file d4tc01231c1.pdf]

## **Electronic Supplementary Information**

**Prudently Designed Se@fMWCNT as Peroxidase Mimicking  
Nanozyme for Distinctive Electrochemical Detection of H<sub>2</sub>O<sub>2</sub>  
and Glutathione**

**Vadakke Purakkal Sruthi and Sellappan Senthilkumar\***

Department of Chemistry, School of Advanced Sciences, Vellore Institute of Technology  
(VIT), Vellore-632014, India.

\*Corresponding author. E-mail: [senthilkumar.s@vit.ac.in](mailto:senthilkumar.s@vit.ac.in), [senthilanalytical@gmail.com](mailto:senthilanalytical@gmail.com)

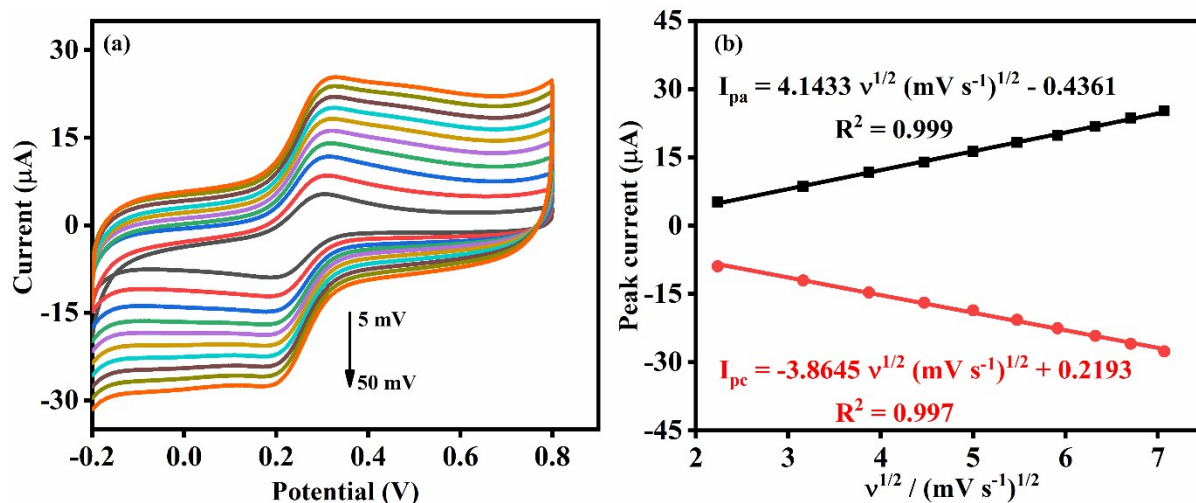

**Fig. S1.** (a) Effect of scan rate of Se@fMWCNT in 0.1 M KCl containing 2.5 mM  $\text{Fe}(\text{CN})_6^{3-}$  at different scan rates from  $5 \text{ mV s}^{-1}$  to  $50 \text{ mV s}^{-1}$ . (b) Plot of square root of scan rate vs. peak current.

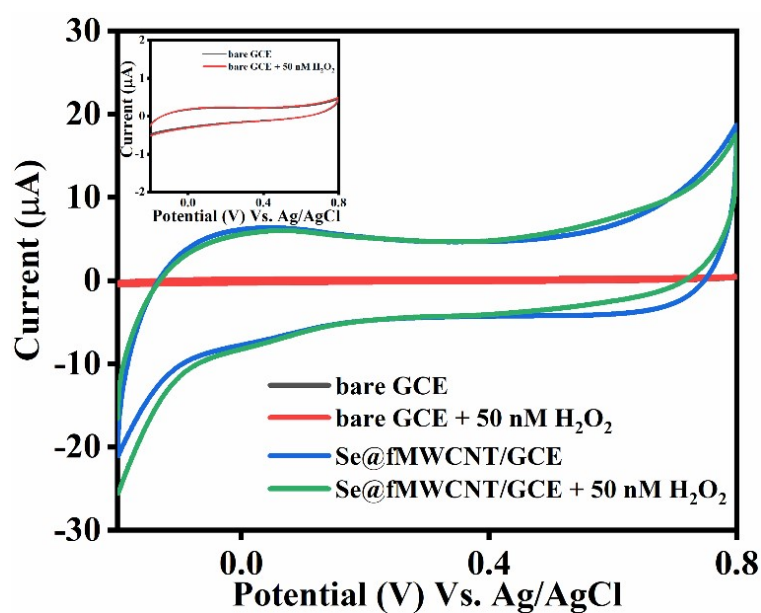

**Fig. S2.** Electrocatalytic activity of bare and Se@fMWCNT modified GCE in the presence (green) and absence (blue) of 50 nM  $\text{H}_2\text{O}_2$  in  $\text{N}_2$  saturated 0.1 M PBS (pH = 7). Inset: Electrocatalytic activity of bare GCE in the presence (red) and absence (black) of 50 nM  $\text{H}_2\text{O}_2$  in  $\text{N}_2$  saturated 0.1 M PBS (pH = 7).

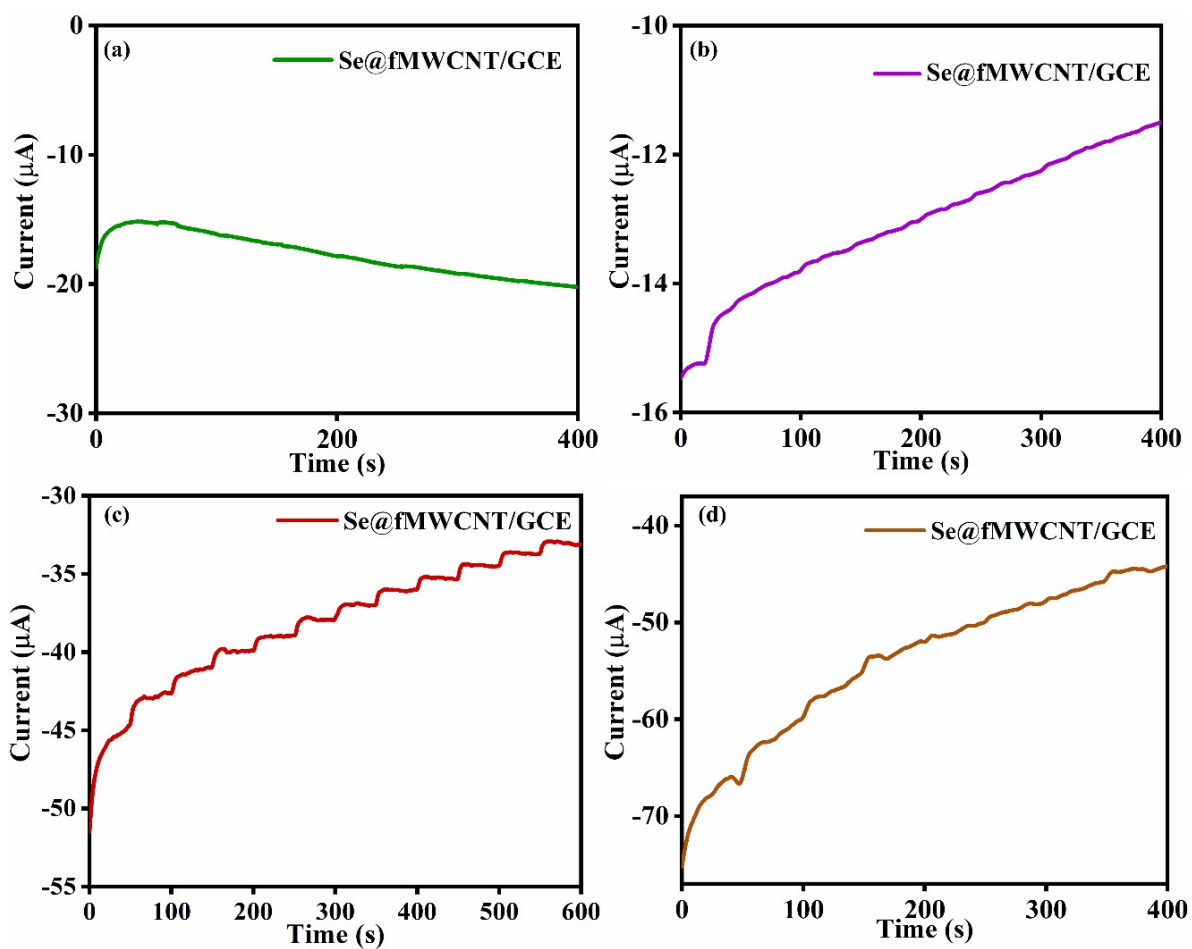

**Fig. S3.** Amperometric (i-t) curve of Se@fMWCNT for successive addition of GSH in N<sub>2</sub> saturated 0.1 M PBS (pH = 7) at -0.2 V in the (a) absence of H<sub>2</sub>O<sub>2</sub> and presence of (b) 0.1 mM H<sub>2</sub>O<sub>2</sub> (c) 1 mM H<sub>2</sub>O<sub>2</sub> and (d) 10 mM H<sub>2</sub>O<sub>2</sub>.

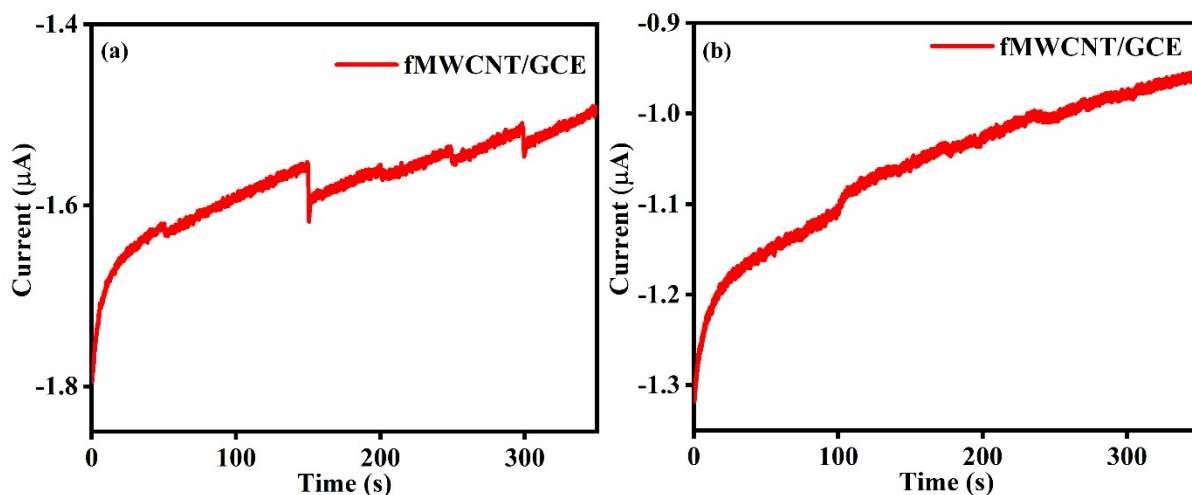

**Fig. S4.** (a) Amperometric (i-t) curve of fMWCNT/GCE for successive addition of H<sub>2</sub>O<sub>2</sub> in 0.1 M PBS (pH=7; N<sub>2</sub> saturated) at an applied potential of -0.2 V. (b) Amperometric (i-t) curve of fMWCNT/GCE for successive addition of GSH in 0.1 M PBS (pH=7; N<sub>2</sub> saturated) containing 1 mM H<sub>2</sub>O<sub>2</sub>, at an applied potential of -0.2 V.

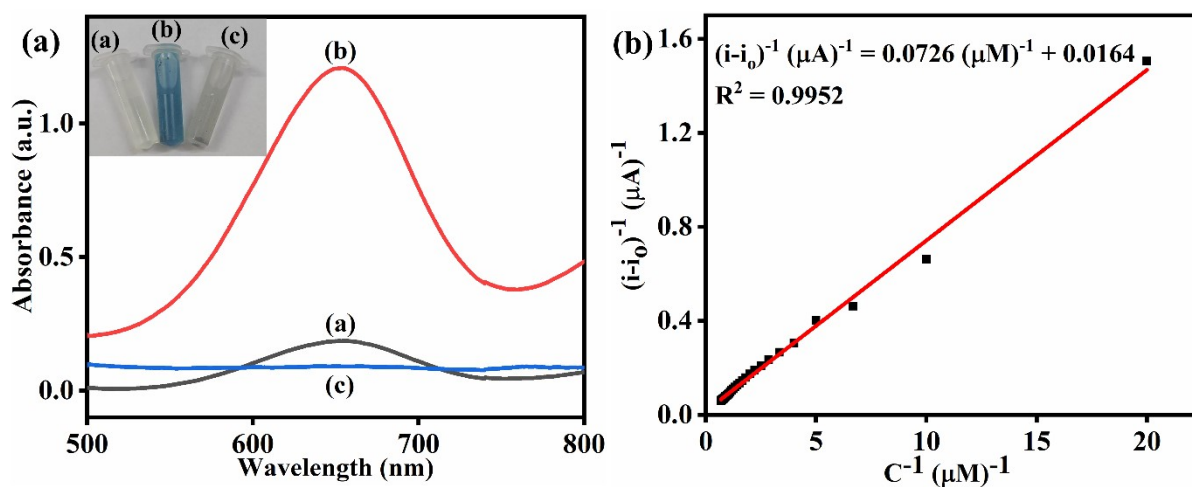

**Fig. S5.** (a) UV-vis absorbance spectra of TMB in the presence of a) 1 mM H<sub>2</sub>O<sub>2</sub>, b) 1 mM H<sub>2</sub>O<sub>2</sub> + 1 mg/mL Se@fMWCNT and c) 1 mM H<sub>2</sub>O<sub>2</sub> + 1 mg/mL Se@fMWCNT + 1 mM GSH (b) 1/C Vs 1/(i-i<sub>0</sub>) plot of Se@fMWCNT nanocomposite obtained from amperometric response.

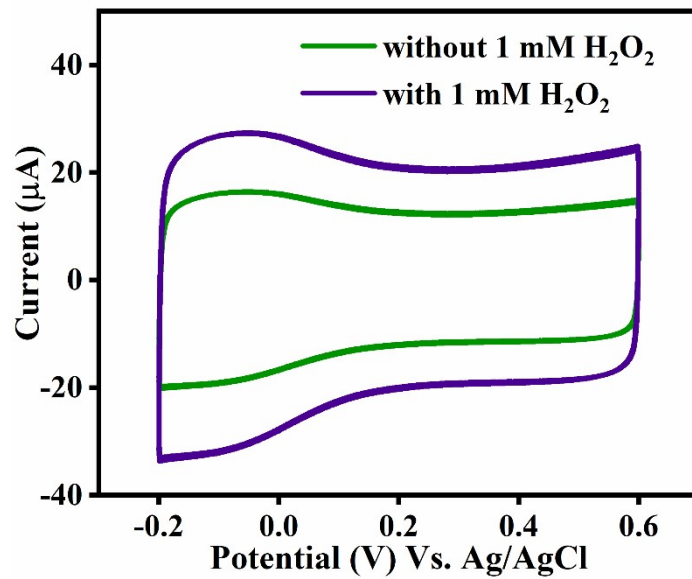

**Fig. S6.** Cyclic voltammogram of Se@fMWCNT/GCE at a scan rate of  $50 \text{ mV s}^{-1}$  in  $\text{N}_2$  saturated  $0.1 \text{ M PBS}$  ( $\text{pH} = 7$ ) after 100 cycles with  $1 \text{ mM H}_2\text{O}_2$  (blue) and without  $1 \text{ mM H}_2\text{O}_2$  (green).

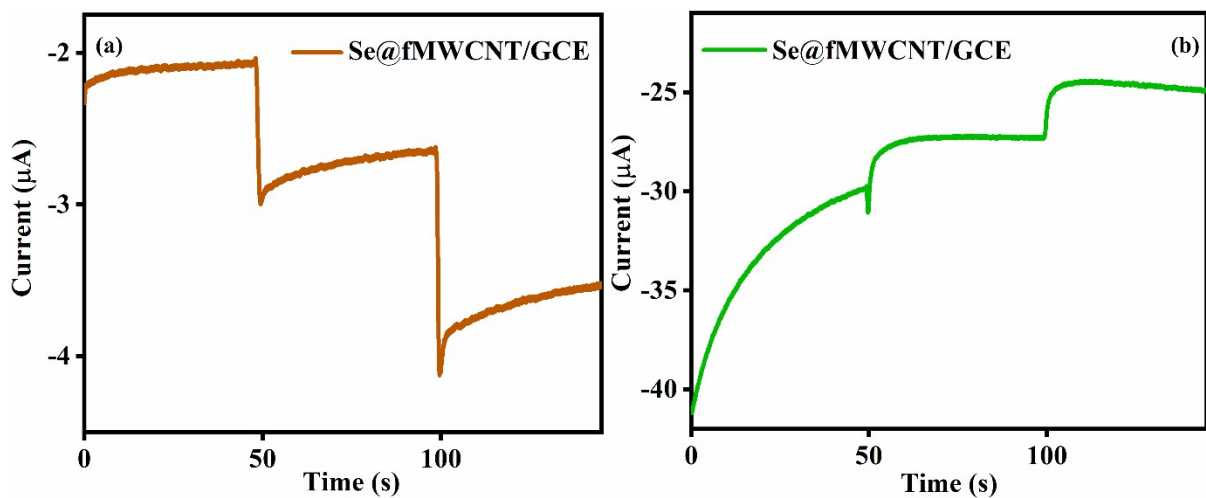

**Fig. S7.** Amperometric response of Se@fMWCNT/GCE at  $-0.2 \text{ V}$  for successive addition of (a)  $\text{H}_2\text{O}_2$  to milk sample in  $0.1 \text{ M PBS}$  ( $\text{pH} = 7$ ;  $\text{N}_2$  saturated) (b) diluted GSH solution in  $0.1 \text{ M PBS}$  ( $\text{pH} = 7$ ;  $\text{N}_2$  saturated) containing  $1 \text{ mM}$  of  $\text{H}_2\text{O}_2$ .
